# Supplementary material
Source: Springer Nature journal article supplement (http://www.springermedizin.de/resource/supplementary/12958_2009_501_MOESM3_ESM.pdf/9568156)

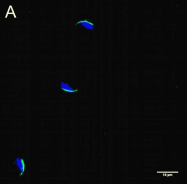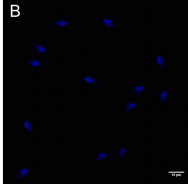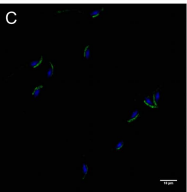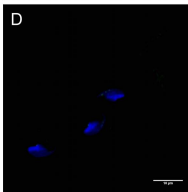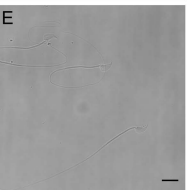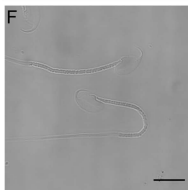

Supplement: MOESM3 [file 9568156]
